# Supplementary material for: Digital security vulnerabilities and threats implications for financial institutions deploying digital technology platforms and application: FMEA and FTOPSIS analysis
Source: PeerJ Comput Sci. 2021 Aug 3;7:e658. doi: 10.7717/peerj-cs.658 (PMC8356653; doi:10.7717/peerj-cs.658)
Supplement: Supplemental Information 1 — Responses that evaluated potential vulnerabilities and threats using failure mode effect and analysis. [file peerj-cs-07-658-s001.xlsx]

## Sheet: OCCURRENCES
	ACC1	ACC2	ACC3	ACC4	NS1	NS2	NS3	NS4	dinf1	dinf2	dinf3	dinf4	INF1	INF2	INF3	INF4	SM1	SM2	SM3	SM4	IDM1	IDM2	IDM3	idm4	CS1	CS2	CS3
DM1	9	10	10	7	10	9	10	8	7	7	6	7	10	10	8	9	9	5	9	5	7	10	10	9.25	8	8	5
DM2	6	6	6	5	5	5	5	5	5	5	5	5	6	4	5	4	5	6	4	5	4	5	5	5	7	5	4
DM3	4	4	4	4	4	4	4	4	3	3	4	3	4	5	4	3	5	3	4	3	3	4	4	3.5	3	4	3
DM4	2	2	1	2	2	2	3	2	3	1	2	2	2	2	4	2	1	2	1	5	5	4	2	3.25	2	2	3
DM5	7	8	8	8	10	3	10	10	3	6	6	5	4	5	4	5	4	3	3	4	4	5	4	4.5	5	3	4
DM6	5	5	6	6	6	6	7	6	7	8	9	10	7	7	6	7	8	8	7	7	5	5	6	5.25	7	6	6
DM7	9	5	9	9	9	4	8	8	7	4	7	8	8	9	9	9	3	3	6	9	9	3	4	5.75	3	5	6
DM8	4	6	7	5	6	5	5	6	5	6	6	5	5	6	5	6	4	6	4	5	7	4	4	5.25	7	6	5
DM9	1	1	1	1	1	1	1	1	1	1	1	1	1	1	1	1	1	1	1	1	1	1	1	1	1	1	1
DM10	5	6	4	4	5	5	4	5	4	4	5	5	5	5	2	3	1	1	2	2	2	3	2	2.25	2	4	5
DM11	2	3	2	2	2	3	3	5	2	1	2	2	1	3	3	2	1	1	1	3	2	2	4	3	4	3	3
DM12	8	9	10	9	8	8	9	8	9	5	6	5	7	8	6	6	6	7	8	7	9	2	5	4.5	6	5	5
DM13	7	7	8	7	7	5	5	5	6	5	6	7	8	9	9	9	8	8	8	8	8	7	6	7	5	5	5
DM14	6	5	5	6	4	5	5	4	4	4	4	4	5	4	4	3	5	4	4	5	5	4	2	3.5	3	4	2
DM15	6	7	7	8	6	6	6	7	6	7	6	8	7	7	7	7	9	9	8	7	6	7	7	6.5	7	8	7
DM16	7	6	6	6	5	6	5	6	5	6	5	6	5	7	7	5	6	6	6	6	6	6	5	5.75	5	5	7
DM17	7	4	6	6	7	8	6	5	5	5	5	4	5	5	4	6	4	6	6	7	4	4	4	4.25	7	7	6
DM18	8	9	8	7	8	7	8	8	10	9	6	8	8	8	8	8	8	10	10	9	9	9	9	9	10	10	9
DM19	2	9	9	10	9	10	9	10	10	9	8	9	10	10	10	10	9	10	9	7	1	1	1	1	8	10	8
DM20	3	8	7	7	2	4	2	3	3	5	5	4	7	8	7	9	6	8	7	9	4	2	2	2.75	5	7	5
DM21	4	4	4	4	10	5	4	5	3	3	3	4	2	2	2	2	5	5	5	5	5	4	2	3.5	2	2	4
DM22	4	4	5	5	7	7	6	5	8	8	8	8	8	6	6	7	7	8	8	7	8	8	8	7.75	7	8	7
DM23	8	9	9	8	8	9	8	9	7	8	9	10	8	9	9	8	8	9	9	9	8	9	9	8.75	2	2	3
DM24	10	5	10	10	10	4	10	9	7	8	6	5	9	10	4	6	10	10	10	9	10	9	4	8	4	6	7
DM25	7	7	9	10	10	4	8	10	10	9	8	9	10	9	8	7	10	8	6	4	10	9	9	9.5	8	8	8
DM26	2	2	4	7	9	10	9	10	9	8	10	8	8	7	5	9	9	8	7	7	10	10	10	10	9	8	4
DM27	5	7	8	9	9	8	9	10	7	9	9	10	10	9	9	9	9	8	9	8	7	7	10	8.25	9	9	9
DM28	8	9	10	9	6	6	6	9	10	8	9	10	7	9	9	9	9	9	8	10	10	9	10	9.5	10	9	9
DM29	9	10	9	9	9	9	10	9	10	8	8	9	7	8	9	9	9	10	9	9	10	5	6	6.75	10	9	10
DM30	9	10	9	8	5	7	4	6	5	8	7	5	9	10	9	10	10	10	9	10	9	10	9	9.5	9	9	9
DM31	9	9	9	8	10	9	10	9	9	10	9	10	2	4	5	7	8	8	8	8	8	9	7	7.5	3	4	6
DM32	4	5	4	5	1	7	6	6	10	9	9	9	10	9	9	10	10	9	8	8	10	9	9	9.25	9	9	6
DM33	5	2	2	3	3	2	4	1	6	3	2	2	2	1	2	4	6	5	4	4	2	4	4	3.5	8	8	5
DM34	8	7	3	4	4	4	7	5	7	5	5	5	10	8	9	6	7	6	7	7	7	7	6	6.5	9	8	8
DM35	10	9	9	8	9	6	7	9	10	9	9	9	10	9	8	9	10	9	8	9	10	9	9	9.25	10	8	9
DM36	10	9	9	10	10	9	9	7	10	9	8	9	10	9	9	8	10	9	8	9	5	5	6	5	7	8	8
DM37	5	5	5	5	6	7	6	5	5	5	5	5	7	7	8	9	10	9	8	9	9	8	9	8.75	9	9	9
DM38	8	7	7	8	9	8	7	7	9	8	7	7	8	8	7	8	8	7	5	5	5	6	5	5.25	5	6	5
DM39	9	9	8	10	10	9	9	10	7	5	6	7	8	9	8	7	5	5	6	5	6	5	5	5	7	6	7
DM40	9	8	8	8	6	7	7	7	9	8	8	6	6	5	7	6	8	7	6	6	8	7	6	6.75	8	7	8
DM41	9	8	9	9	9	8	9	10	10	8	9	8	10	9	8	9	10	9	9	8	10	9	9	9.25	10	9	9
DM42	9	8	9	10	10	8	9	10	10	9	8	10	9	8	8	9	7	7	7	8	10	10	9	9.5	10	8	8
DM43	8	9	9	8	9	8	9	9	10	9	8	10	9	9	8	9	10	9	9	8	9	8	8	8	10	9	8
DM44	7	6	5	6	6	6	7	6	5	6	5	6	5	6	6	7	8	7	7	6	8	7	7	7	8	7	7
DM45	9	9	8	9	9	7	8	8	9	9	8	8	9	9	10	8	10	9	8	8	9	9	9	8.75	7	8	9
DM46	9	8	8	8	7	7	9	8	8	8	8	7	8	8	8	8	9	8	8	8	9	8	9	8.5	9	8	9
DM47	9	8	9	10	9	9	10	8	10	9	9	8	8	9	8	8	9	8	9	8	8	9	10	9	9	9	9
DM48	9	9	7	7	8	8	7	7	8	7	6	5	6	6	6	6	6	7	8	7	8	7	9	8	9	7	7
DM49	6	6	6	6	6	6	6	6	6	6	6	6	6	6	6	6	6	6	6	6	6	6	6	6	6	6	6
DM50	5	7	7	7	8	6	9	10	7	8	8	8	7	7	9	7	9	9	10	9	7	7	6	7	9	4	6
DM51	8	9	9	8	9	8	9	9	10	8	9	9	9	9	8	10	8	7	7	8	9	8	10	9	9	8	9
DM52	5	5	6	5	4	5	6	5	5	5	5	6	6	5	4	5	5	6	5	6	6	5	7	6	6	7	7
DM53	6	6	5	6	7	7	6	6	7	6	6	7	7	6	6	5	7	6	6	5	6	6	5	5.75	7	7	6
DM54	8	8	7	8	7	6	6	8	9	7	8	8	9	8	9	9	9	8	9	8	9	9	9	8.75	9	8	8
DM55	4	4	5	6	5	4	5	4	7	8	6	9	8	6	5	6	7	6	5	4	4	5	5	5	4	4	5
DM56	8	8	6	7	8	8	6	8	8	8	5	7	8	6	8	6	8	6	7	8	8	6	6	7	8	6	6
DM57	8	7	8	8	9	10	9	9	6	5	4	6	8	7	6	5	9	8	8	7	10	9	9	9	8	8	7
DM58	8	7	7	6	9	9	9	9	9	7	5	4	4	4	5	9	10	8	6	7	9	7	6	7.5	9	8	7
DM59	4	3	4	3	4	3	4	5	3	5	4	5	6	5	5	6	5	6	5	6	4	4	3	3.5	4	6	6
DM60	6	6	5	6	7	6	7	7	6	8	6	6	7	6	5	7	7	8	6	7	7	8	7	7	6	7	7
DM61	8	7	8	8	9	9	9	9	9	10	10	10	6	6	7	8	9	9	9	9	10	6	8	8.25	3	3	4
DM62	8	8	7	6	8	7	7	8	8	7	7	7	8	8	8	9	8	7	6	7	8	9	8	8	8	7	9
DM63	3	3	3	3	4	5	4	3	4	5	5	6	5	5	6	6	4	5	4	5	4	5	5	4.5	5	4	5
DM64	3	4	4	4	4	3	5	4	3	5	3	5	4	4	5	5	4	6	5	4	4	6	6	5	4	3	5
DM65	7	7	6	5	6	8	9	8	9	7	7	7	7	7	7	6	6	6	6	6	8	7	6	7	6	6	6
DM66	10	9	10	9	9	9	10	8	8	8	9	10	7	5	8	9	5	5	3	7	4	4	4	4	7	6	9
DM67	4	4	4	4	1	1	1	1	1	1	1	6	6	4	2	5	9	2	2	4	5	2	3	3.25	3	1	3
DM68	9	9	9	1	2	2	2	5	4	5	5	2	2	4	4	4	8	8	8	8	8	5	6	6	8	8	2
DM69	4	4	4	4	4	4	4	4	4	4	4	4	7	7	7	7	8	8	8	8	3	3	3	3	8	8	8
DM70	9	9	10	7	10	9	10	8	7	7	6	7	10	10	8	9	9	5	9	5	7	10	10	9.25	8	8	5
DM71	6	6	6	5	5	5	5	5	5	5	5	5	6	4	5	4	5	6	4	5	4	5	5	5	7	5	4
DM72	4	4	4	4	4	4	4	4	3	3	4	3	4	5	4	3	5	3	4	3	3	4	4	3.5	3	4	3
DM73	2	2	1	2	2	2	3	2	3	1	2	2	2	2	4	2	1	2	1	5	5	4	2	3.25	2	2	3
DM74	7	8	8	8	10	3	10	10	3	6	6	5	4	5	4	5	4	3	3	4	4	5	4	4.5	5	3	4
DM75	5	5	6	6	6	6	7	6	7	8	9	10	7	7	6	7	8	8	7	7	5	5	6	5.25	7	6	6
DM76	9	5	9	9	9	4	8	8	7	4	7	8	8	9	9	9	3	3	6	9	9	3	4	5.75	3	5	6
DM77	4	6	7	5	6	5	5	6	5	6	6	5	5	6	5	6	4	6	4	5	7	4	4	5.25	7	6	5
DM78	1	1	1	1	1	1	1	1	1	1	1	1	1	1	1	1	1	1	1	1	1	1	1	1	1	1	1
DM79	5	6	4	4	5	5	4	5	4	4	5	5	5	5	2	3	1	1	2	2	2	3	2	2.25	2	4	5
DM80	2	3	2	2	2	3	3	5	2	1	2	2	1	3	3	2	1	1	1	3	2	2	4	3	4	3	3
DM81	8	9	10	9	8	8	9	8	9	5	6	5	7	8	6	6	6	7	8	7	9	2	5	4.5	6	5	5
DM82	7	7	8	7	7	5	5	5	6	5	6	7	8	9	9	9	8	8	8	8	8	7	6	7	5	5	5
DM83	6	5	5	6	4	5	5	4	4	4	4	4	5	4	4	3	5	4	4	5	5	4	2	3.5	3	4	2
DM84	6	7	7	8	6	6	6	7	6	7	6	8	7	7	7	7	9	9	8	7	6	7	7	6.5	7	8	7
DM85	7	6	6	6	5	6	5	6	5	6	5	6	5	7	7	5	6	6	6	6	6	6	5	5.75	5	5	7
DM86	7	4	6	6	7	8	6	5	5	5	5	4	5	5	4	6	4	6	6	7	4	4	4	4.25	7	7	6
DM87	8	9	8	7	8	7	8	8	10	9	6	8	8	8	8	8	8	10	10	9	9	9	9	9	10	10	9
DM88	2	9	9	10	9	10	9	10	10	9	8	9	10	10	10	10	9	10	9	7	1	1	1	1	8	10	8
DM89	3	8	7	7	2	4	2	3	3	5	5	4	7	8	7	9	6	8	7	9	4	2	2	2.75	5	7	5
DM90	4	4	4	4	10	5	4	5	3	3	3	4	2	2	2	2	5	5	5	5	5	4	2	3.5	2	2	4
DM91	4	4	5	5	7	7	6	5	8	8	8	8	8	6	6	7	7	8	8	7	8	8	8	7.75	7	8	7
DM92	8	9	9	8	8	9	8	9	7	8	9	10	8	9	9	8	8	9	9	9	8	9	9	8.75	2	2	3
DM93	10	5	10	10	10	4	10	9	7	8	6	5	9	10	4	6	10	10	10	9	10	9	4	8	4	6	7
DM94	7	7	9	10	10	4	8	10	10	9	8	9	10	9	8	7	10	8	6	4	10	9	9	9.5	8	8	8
DM95	2	2	4	7	9	10	9	10	9	8	10	8	8	7	5	9	9	8	7	7	10	10	10	10	9	8	4
DM96	5	7	8	9	9	8	9	10	7	9	9	10	10	9	9	9	9	8	9	8	7	7	10	8.25	9	9	9
DM97	8	9	10	9	6	6	6	9	10	8	9	10	7	9	9	9	9	9	8	10	10	9	10	9.5	10	9	9
DM98	9	10	9	9	9	9	10	9	10	8	8	9	7	8	9	9	9	10	9	9	10	5	6	6.75	10	9	10
DM99	9	10	9	8	5	7	4	6	5	8	7	5	9	10	9	10	10	10	9	10	9	10	9	9.5	9	9	9
DM100	9	9	9	8	10	9	10	9	9	10	9	10	2	4	5	7	8	8	8	8	8	9	7	7.5	3	4	6
DM101	4	5	4	5	1	7	6	6	10	9	9	9	10	9	9	10	10	9	8	8	10	9	9	9.25	9	9	6
DM102	5	2	2	3	3	2	4	1	6	3	2	2	2	1	2	4	6	5	4	4	2	4	4	3.5	8	8	5
DM103	8	7	3	4	4	4	7	5	7	5	5	5	10	8	9	6	7	6	7	7	7	7	6	6.5	9	8	8
DM104	10	9	9	8	9	6	7	9	10	9	9	9	10	9	8	9	10	9	8	9	10	9	9	9.25	10	8	9
DM105	10	9	9	10	10	9	9	7	10	9	8	9	10	9	9	8	10	9	8	9	5	5	6	5	7	8	8
DM106	5	5	5	5	6	7	6	5	5	5	5	5	7	7	8	9	10	9	8	9	9	8	9	8.75	9	9	9
DM107	8	7	7	8	9	8	7	7	9	8	7	7	8	8	7	8	8	7	5	5	5	6	5	5.25	5	6	5
DM108	9	9	8	10	10	9	9	10	7	5	6	7	8	9	8	7	5	5	6	5	6	5	5	5	7	6	7
DM109	9	8	8	8	6	7	7	7	9	8	8	6	6	5	7	6	8	7	6	6	8	7	6	6.75	8	7	8
DM110	9	8	9	9	9	8	9	10	10	8	9	8	10	9	8	9	10	9	9	8	10	9	9	9.25	10	9	9
DM111	9	8	9	10	10	8	9	10	10	9	8	10	9	8	8	9	7	7	7	8	10	10	9	9.5	10	8	8
DM112	8	9	9	8	9	8	9	9	10	9	8	10	9	9	8	9	10	9	9	8	9	8	8	8	10	9	8
DM113	7	6	5	6	6	6	7	6	5	6	5	6	5	6	6	7	8	7	7	6	8	7	7	7	8	7	7
DM114	9	9	8	9	9	7	8	8	9	9	8	8	9	9	10	8	10	9	8	8	9	9	9	8.75	7	8	9
DM115	9	8	8	8	7	7	9	8	8	8	8	7	8	8	8	8	9	8	8	8	9	8	9	8.5	9	8	9
DM116	9	8	9	10	9	9	10	8	10	9	9	8	8	9	8	8	9	8	9	8	8	9	10	9	9	9	9
DM117	9	9	7	7	8	8	7	7	8	7	6	5	6	6	6	6	6	7	8	7	8	7	9	8	9	7	7
DM118	6	6	6	6	6	6	6	6	6	6	6	6	6	6	6	6	6	6	6	6	6	6	6	6	6	6	6
DM119	5	7	7	7	8	6	9	10	7	8	8	8	7	7	9	7	9	9	10	9	7	7	6	7	9	4	6
DM120	8	9	9	8	9	8	9	9	10	8	9	9	9	9	8	10	8	7	7	8	9	8	10	9	9	8	9
DM121	5	5	6	5	4	5	6	5	5	5	5	6	6	5	4	5	5	6	5	6	6	5	7	6	6	7	7
DM122	6	6	5	6	7	7	6	6	7	6	6	7	7	6	6	5	7	6	6	5	6	6	5	5.75	7	7	6
DM123	8	8	7	8	7	6	6	8	9	7	8	8	9	8	9	9	9	8	9	8	9	9	9	8.75	9	8	8
DM124	4	4	5	6	5	4	5	4	7	8	6	9	8	6	5	6	7	6	5	4	4	5	5	5	4	4	5
DM125	8	8	6	7	8	8	6	8	8	8	5	7	8	6	8	6	8	6	7	8	8	6	6	7	8	6	6
DM126	8	7	8	8	9	10	9	9	6	5	4	6	8	7	6	5	9	8	8	7	10	9	9	9	8	8	7
DM127	8	7	7	6	9	9	9	9	9	7	5	4	4	4	5	9	10	8	6	7	9	7	6	7.5	9	8	7
DM128	4	3	4	3	4	3	4	5	3	5	4	5	6	5	5	6	5	6	5	6	4	4	3	3.5	4	6	6
DM129	6	6	5	6	7	6	7	7	6	8	6	6	7	6	5	7	7	8	6	7	7	8	7	7	6	7	7
DM130	8	7	8	8	9	9	9	9	9	10	10	10	6	6	7	8	9	9	9	9	10	6	8	8.25	3	3	4
DM131	8	8	7	6	8	7	7	8	8	7	7	7	8	8	8	9	8	7	6	7	8	9	8	8	8	7	9
DM132	3	3	3	3	4	5	4	3	4	5	5	6	5	5	6	6	4	5	4	5	4	5	5	4.5	5	4	5
DM133	3	4	4	4	4	3	5	4	3	5	3	5	4	4	5	5	4	6	5	4	4	6	6	5	4	3	5
DM134	7	7	6	5	6	8	9	8	9	7	7	7	7	7	7	6	6	6	6	6	8	7	6	7	6	6	6
DM135	10	9	10	9	9	9	10	8	8	8	9	10	7	5	8	9	5	5	3	7	4	4	4	4	7	6	9
DM136	4	4	4	4	1	1	1	1	1	1	1	6	6	4	2	5	9	2	2	4	5	2	3	3.25	3	1	3
DM137	9	9	9	1	2	2	2	5	4	5	5	2	2	4	4	4	8	8	8	8	8	5	6	6	8	8	2
DM138	4	4	4	4	4	4	4	4	4	4	4	4	7	7	7	7	8	8	8	8	3	3	3	3	8	8	8
DM139	2	2	2	2	2	2	1	1	2	2	2	2	2	2	2	2	2	2	3	3	3	3	3	3	3	3	3
DM140	5	7	8	9	9	8	9	10	7	9	9	10	10	9	9	9	9	8	9	8	7	7	10	8.25	9	9	9
DM141	8	9	10	9	6	6	6	9	10	8	9	10	7	9	9	9	9	9	8	10	10	9	10	9.5	10	9	9
DM142	9	10	9	9	9	9	10	9	10	8	8	9	7	8	9	9	9	10	9	9	10	5	6	6.75	10	9	10
DM143	9	10	9	8	5	7	4	6	5	8	7	5	9	10	9	10	10	10	9	10	9	10	9	9.5	9	9	9
DM144	9	9	9	8	10	9	10	9	9	10	9	10	2	4	5	7	8	8	8	8	8	9	7	7.5	3	4	6
DM145	4	5	4	5	1	7	6	6	10	9	9	9	10	9	9	10	10	9	8	8	10	9	9	9.25	9	9	6
DM146	5	2	2	3	3	2	4	1	6	3	2	2	2	1	2	4	6	5	4	4	2	4	4	3.5	8	8	5
DM147	8	7	3	4	4	4	7	5	7	5	5	5	10	8	9	6	7	6	7	7	7	7	6	6.5	9	8	8
DM148	10	9	9	8	9	6	7	9	10	9	9	9	10	9	8	9	10	9	8	9	10	9	9	9.25	10	8	9
DM149	10	9	9	10	10	9	9	7	10	9	8	9	10	9	9	8	10	9	8	9	5	5	6	5	7	8	8
DM150	5	5	5	5	6	7	6	5	5	5	5	5	7	7	8	9	10	9	8	9	9	8	9	8.75	9	9	9
DM151	8	7	7	8	9	8	7	7	9	8	7	7	8	8	7	8	8	7	5	5	5	6	5	5.25	5	6	5
DM152	9	9	8	10	10	9	9	10	7	5	6	7	8	9	8	7	5	5	6	5	6	5	5	5	7	6	7
DM153	9	8	8	8	6	7	7	7	9	8	8	6	6	5	7	6	8	7	6	6	8	7	6	6.75	8	7	8
DM154	9	8	9	9	9	8	9	10	10	8	9	8	10	9	8	9	10	9	9	8	10	9	9	9.25	10	9	9
DM155	9	8	9	10	10	8	9	10	10	9	8	10	9	8	8	9	7	7	7	8	10	10	9	9.5	10	8	8
DM156	8	9	9	8	9	8	9	9	10	9	8	10	9	9	8	9	10	9	9	8	9	8	8	8	10	9	8
DM157	7	6	5	6	6	6	7	6	5	6	5	6	5	6	6	7	8	7	7	6	8	7	7	7	8	7	7
DM158	10	10	10	10	10	10	10	7	10	10	7	10	10	10	10	7	10	10	7	10	5	5	5	4.5	7	7	7
DM159	5	5	5	5	5	7	5	5	5	5	5	5	7	7	7	10	10	10	7	10	10	7	10	9.25	10	10	10
DM160	7	7	7	7	10	7	7	7	10	7	7	7	7	7	7	7	7	7	5	5	5	5	5	5	5	5	5
DM161	10	10	7	10	10	10	10	10	7	5	5	7	7	10	7	7	5	5	5	5	5	5	5	4.5	7	5	7
DM162	10	7	7	7	5	7	7	7	10	7	7	5	5	5	7	5	7	7	5	5	7	7	5	6	7	7	7
DM163	10	7	10	10	10	7	10	10	10	7	10	7	10	10	7	10	10	10	10	7	10	10	10	10	10	10	10
DM164	10	7	10	10	10	7	10	10	10	10	7	10	10	7	7	10	7	7	7	7	10	10	10	10	10	7	7
DM165	7	10	10	7	10	7	10	10	10	10	7	10	10	10	7	10	10	10	10	7	10	7	7	7.75	10	10	7
DM166	7	5	5	5	5	5	7	5	5	5	5	5	5	5	5	7	7	7	7	5	7	7	7	6.5	7	7	7
DM167	10	10	7	10	10	7	7	7	10	10	7	7	10	10	10	7	10	10	7	7	10	10	10	9.25	7	7	10
DM168	5	7	3	7	3	3	7	3	7	5	7	5	5	3	5	5	3	7	5	5	7	5	7	6	5	5	5
DM169	7	7	7	7	7	7	7	7	7	7	7	7	5	5	5	5	5	7	5	7	5	7	7	6.5	5	5	5
DM170	3	3	1	5	1	3	3	5	3	1	5	3	3	5	3	3	3	3	3	5	3	3	5	4	1	3	5
DM171	5	7	5	5	3	3	3	5	5	5	5	3	5	7	5	5	5	5	5	5	5	5	5	5	7	5	7
DM172	1	3	3	3	3	5	3	1	1	1	1	1	1	5	3	5	5	5	3	1	3	5	5	4.5	3	1	3
DM173	3	1	5	7	5	5	7	7	5	1	5	5	7	5	5	3	1	7	5	7	5	7	5	5.5	7	5	5
DM174	5	5	7	7	7	5	5	7	5	1	1	1	1	7	5	5	1	7	5	8	8	7	7	6.75	7	5	5
DM175	5	5	5	7	5	5	5	7	7	1	1	1	1	7	7	7	5	7	5	5	5	7	7	6.5	7	7	7
DM176	3	1	1	1	1	1	1	1	1	1	1	3	1	1	1	1	1	1	1	1	1	1	1	1	1	7	5
DM177	5	5	7	7	7	5	7	7	5	1	5	1	1	5	5	5	5	5	5	5	5	7	5	5.5	5	7	7
DM178	4	3	4	3	4	3	4	5	3	5	4	5	6	5	5	6	5	6	5	6	4	4	3	3.5	4	6	6
DM179	6	6	5	6	7	6	7	7	6	8	6	6	7	6	5	7	7	8	6	7	7	8	7	7	6	7	7
DM180	8	7	8	8	9	9	9	9	9	10	10	10	6	6	7	8	9	9	9	9	10	6	8	8.25	3	3	4
DM181	8	8	7	6	8	7	7	8	8	7	7	7	8	8	8	9	8	7	6	7	8	9	8	8	8	7	9
DM182	3	3	3	3	4	5	4	3	4	5	5	6	5	5	6	6	4	5	4	5	4	5	5	4.5	5	4	5
DM183	3	4	4	4	4	3	5	4	3	5	3	5	4	4	5	5	4	6	5	4	4	6	6	5	4	3	5
DM184	7	7	6	5	6	8	9	8	9	7	7	7	7	7	7	6	6	6	6	6	8	7	6	7	6	6	6
DM185	10	9	10	9	9	9	10	8	8	8	9	10	7	5	8	9	5	5	3	7	4	4	4	4	7	6	9
DM186	4	4	4	4	1	1	1	1	1	1	1	6	6	4	2	5	9	2	2	4	5	2	3	3.25	3	1	3
DM187	9	9	9	1	2	2	2	5	4	5	5	2	2	4	4	4	8	8	8	8	8	5	6	6	8	8	2
DM188	4	4	4	4	4	4	4	4	4	4	4	4	7	7	7	7	8	8	8	8	3	3	3	3	8	8	8
DM189	2	2	2	2	2	2	1	1	2	2	2	2	2	2	2	2	2	2	3	3	3	3	3	3	3	3	3
DM190	1	1	3	3	1	5	3	1	7	3	3	3	7	3	3	7	7	7	7	7	7	7	7	7	7	5	5
DM191	5	5	5	5	3	5	5	5	5	5	5	5	5	5	1	5	5	5	7	5	5	7	5	6	7	7	7
DM192	5	5	5	5	5	5	5	5	3	5	5	3	5	5	5	5	7	7	5	5	7	7	7	6.5	5	7	5
DM193	5	5	5	5	3	5	5	5	5	5	5	5	5	5	3	5	5	5	5	5	5	5	7	5.5	5	7	7
DM194	5	5	5	5	7	7	5	5	7	5	5	7	7	5	5	5	7	5	5	5	5	5	5	5	7	7	5
DM195	7	7	7	7	7	5	5	7	10	7	7	7	10	7	10	10	10	7	10	7	10	10	10	9.25	10	7	7
DM196	3	3	5	5	5	3	5	3	7	7	5	10	7	5	5	5	7	5	5	3	3	5	5	4.5	3	3	5
DM197	7	7	5	7	7	7	5	7	7	7	5	7	7	5	7	5	7	5	7	7	7	5	5	6	7	5	5
DM198	7	7	7	7	10	10	10	10	5	5	3	5	7	7	5	5	10	7	7	7	10	10	10	9.25	7	7	7
DM199	7	7	7	5	10	10	10	10	10	7	5	3	3	3	5	10	10	7	5	7	10	7	5	7.25	10	7	7
DM200	3	3	3	3	3	3	3	5	3	5	3	5	5	5	5	5	5	5	5	5	3	3	3	3	3	5	5
DM201	5	5	5	5	7	5	7	7	5	7	5	5	7	5	5	7	7	7	5	7	7	7	7	6.5	5	7	7
DM202	7	7	7	7	10	10	10	10	10	10	10	10	5	5	7	7	10	10	10	10	10	5	7	8	3	3	3
DM203	7	7	7	5	7	7	7	7	7	7	7	7	7	7	7	10	7	7	5	7	7	10	7	7.75	7	7	10
DM204	3	3	3	3	3	5	3	3	3	5	5	5	5	5	5	5	3	5	3	5	3	5	5	4	5	3	5
DM205	3	3	3	3	3	3	5	3	3	5	3	5	3	3	5	5	3	5	5	3	3	5	5	4	3	3	5
DM206	7	7	5	5	5	7	10	7	10	7	7	7	7	7	7	5	5	5	5	5	7	7	5	6.5	5	5	5
DM207	7	6	8	8	8	8	7	6	7	6	7	10	10	8	9	6	8	7	8	7	9	9	9	8.75	8	9	8
DM208	4	4	4	5	4	4	5	4	5	5	5	6	4	6	4	6	5	6	3	4	4	3	3	3.5	4	3	4
DM209	4	5	5	6	5	5	5	4	5	7	6	7	5	5	4	5	5	5	5	4	4	5	5	4.5	4	5	4
DM210	3	3	5	1	1	1	1	3	1	5	5	6	3	4	6	6	6	6	4	3	1	2	3	2.25	4	4	8
DM211	4	3	5	4	3	5	3	5	5	4	5	4	4	4	3	4	3	4	5	4	5	6	4	5.25	4	3	3
DM212	3	2	3	3	2	4	2	4	2	2	4	4	2	3	2	3	3	4	3	3	3	3	2	3	3	3	3
DM213	4	4	5	4	4	4	5	6	5	5	6	4	3	3	3	2	4	3	2	2	4	2	5	3.75	6	3	3
DM214	3	2	3	3	4	5	4	3	3	2	3	3	4	4	4	3	3	3	3	3	4	4	3	3.75	3	4	2
DM215	2	2	2	4	4	4	3	4	4	2	3	4	6	4	3	5	5	5	7	9	6	8	5	7.25	5	5	9
DM216	8	9	8	9	9	8	10	10	8	10	9	9	3	8	8	4	9	10	9	9	10	10	7	9	7	5	8
DM217	10	9	9	9	7	9	10	7	10	8	9	6	7	8	7	8	10	8	8	9	10	9	8	8.5	10	8	8
DM218	8	9	6	7	10	6	6	8	8	9	9	7	7	7	7	7	7	8	7	9	9	9	9	9	8	9	7
DM219	8	8	8	9	9	10	9	8	9	10	8	7	6	7	8	9	9	10	10	10	10	9	10	9.5	10	9	9
DM220	7	8	8	7	10	9	10	9	9	8	8	9	9	8	9	9	9	9	8	8	8	9	9	8.5	9	8	8
DM221	9	9	9	8	9	9	7	6	6	8	7	7	6	7	7	8	10	9	8	7	10	10	10	10	10	9	10
DM222	8	8	9	9	9	9	9	9	9	9	8	9	9	8	9	9	8	9	8	7	9	9	9	9	8	9	8
DM223	9	7	7	8	10	10	9	9	9	7	9	10	10	9	8	9	10	9	9	9	10	9	9	9	10	9	10
DM224	9	9	9	9	9	9	9	9	9	9	9	9	9	9	9	9	9	9	9	9	9	9	9	9	9	9	9
DM225	8	9	7	8	9	9	8	8	9	9	8	9	8	9	9	9	8	9	9	10	10	9	10	9.5	9	9	10
DM226	8	9	10	8	9	9	9	8	10	9	8	9	9	9	8	10	10	9	8	9	8	9	10	8.75	7	8	9
DM227	8	8	9	8	9	8	9	8	8	9	9	8	8	9	9	8	9	9	8	9	10	9	8	9	8	9	9
DM228	9	8	9	9	9	8	9	9	9	9	8	9	9	8	9	9	8	9	8	9	9	9	10	9.25	8	9	8
DM229	7	7	8	8	9	8	8	7	7	9	7	6	6	7	7	7	7	8	7	8	7	8	7	7.5	8	8	8
DM230	8	8	8	8	8	8	8	8	8	8	9	8	8	8	9	8	8	7	8	8	8	8	8	8.25	7	8	9
DM231	8	8	8	8	8	8	8	8	8	8	8	8	8	8	8	8	8	8	8	8	8	8	8	8	8	8	8
DM232	8	7	8	8	8	8	8	8	8	8	8	8	8	8	8	8	8	8	8	8	8	8	8	8	8	8	8
DM233	5	3	4	3	4	4	4	4	3	4	4	3	3	4	4	3	3	3	4	3	3	3	4	3.25	3	4	3
DM234	9	9	8	7	9	8	9	8	8	9	10	9	9	10	9	8	8	7	8	7	8	7	8		7	6	6

## Sheet: SEVERITY
FM	Acc1	Acc2	Acc3	acc4	ns1	ns2	ns3	ns4	dinf1	dinf2	dinf3	dinf4	inf1	inf2	inf3	inf4	sm1	sm2	sm3	sm4	idm1	idm2	idm3	idm4	cs1	cs2	cs3
DM1	9	9	9	9	9	8	9	8	9	8	9	8	9	8	9	8	8	8	6	9	9	9	6	9	9	6	9
DM2	6	6	8	8	9	8	8	8	8	8	8	8	6	6	6	6	8	4	6	6	6	6	4	4	8	8	6
DM3	6	6	6	6	6	6	6	6	8	8	8	6	8	6	8	8	6	6	6	8	8	8	8	6	8	6	8
DM4	9	4	6	8	9	9	9	9	8	2	6	6	4	9	8	4	4	2	6	2	4	4	4	4	4	8	2
DM5	6	4	6	4	8	8	8	8	8	4	6	8	8	9	8	4	4	6	6	8	6	4	4	6	6	8	6
DM6	8	8	8	8	6	4	4	4	4	4	4	4	4	4	4	6	4	4	6	4	6	6	6	4	6	6	6
DM7	4	8	6	6	4	6	6	8	4	6	8	6	6	4	6	4	4	6	8	6	6	6	4	6	6	6	4
DM8	9	9	9	6	9	9	9	9	6	6	6	6	9	9	9	6	8	6	6	8	9	9	9	8	9	9	9
DM9	2	2	2	2	2	2	4	2	4	2	2	2	2	2	2	2	2	2	2	2	2	2	2	2	2	2	2
DM10	4	4	4	8	9	8	9	9	8	6	9	8	9	9	9	9	9	8	8	8	9	9	9	9	9	6	8
DM11	9	6	8	9	8	9	6	9	8	4	8	4	9	9	9	9	2	2	2	2	2	2	2	2	2	2	2
DM12	8	8	8	8	6	6	8	8	9	9	9	9	8	8	9	8	8	8	8	8	8	6	9	6	8	8	9
DM13	8	8	8	9	8	8	8	8	8	8	8	8	9	9	9	9	9	8	9	8	8	8	9	8	8	8	8
DM14	9	9	8	9	9	9	9	9	9	8	8	9	6	6	6	6	6	8	8	8	8	6	6	6	6	6	6
DM15	6	6	8	8	6	8	8	8	6	8	6	6	8	8	8	8	9	8	9	9	8	8	8	8	8	8	8
DM16	8	8	8	8	8	8	8	8	8	8	8	8	8	8	8	8	6	8	6	8	8	8	8	8	8	8	8
DM17	6	8	6	8	4	4	6	9	9	8	9	8	6	6	6	6	8	6	6	6	8	8	6	8	9	9	8
DM18	8	8	8	8	9	9	8	8	8	6	8	6	9	6	6	8	4	6	6	8	9	9	9	9	8	8	8
DM19	4	6	6	8	4	6	6	8	8	8	9	9	8	8	9	8	9	9	9	9	8	9	9	9	8	8	6
DM20	9	9	9	8	9	8	9	9	8	9	8	8	8	8	9	9	9	9	9	9	9	9	9	9	9	9	9
DM21	6	6	6	2	4	2	4	4	4	4	4	4	8	6	6	4	2	4	4	6	8	6	4	2	2	4	4
DM22	4	8	8	9	6	4	6	9	8	4	8	9	6	8	8	8	8	6	8	6	8	8	4	8	8	6	8
DM23	4	6	6	8	8	9	9	8	4	6	6	8	6	6	6	6	9	9	9	9	9	9	9	8	8	9	9
DM24	9	8	8	2	6	6	4	4	8	8	8	8	8	8	6	8	9	9	9	9	9	9	6	9	9	9	6
DM25	9	9	8	9	9	9	9	9	9	9	9	9	9	9	9	8	8	9	8	9	6	9	9	9	9	9	9
DM26	9	9	9	9	9	9	9	8	6	9	9	9	8	9	9	9	9	9	8	8	9	9	9	9	9	8	9
DM27	8	8	8	9	6	6	6	6	9	9	9	9	8	9	9	8	9	9	8	9	6	6	6	8	6	6	6
DM28	9	9	9	9	9	9	9	9	9	9	9	9	9	9	9	9	9	9	9	9	9	9	9	9	9	9	9
DM29	9	8	9	9	9	9	9	9	9	9	8	9	9	9	9	9	9	9	8	8	9	9	9	9	9	9	8
DM30	8	9	9	9	6	6	8	8	9	9	8	8	9	9	9	9	9	8	9	9	9	9	9	9	9	8	8
DM31	9	9	9	9	9	9	9	9	9	9	9	9	9	9	8	6	9	8	6	8	9	9	9	9	9	9	8
DM32	9	9	9	9	9	9	9	9	9	9	9	9	8	9	9	8	8	9	9	9	9	9	9	9	9	9	9
DM33	9	9	8	9	9	9	9	9	8	9	9	6	8	9	9	6	8	9	9	9	8	9	8	6	9	8	9
DM34	8	6	8	9	9	9	9	8	9	9	9	9	9	9	9	8	9	9	9	8	9	8	8	9	9	9	9
DM35	9	9	8	8	9	9	9	9	9	8	9	9	9	9	9	9	9	9	8	8	8	6	8	8	9	8	8
DM36	9	9	9	9	9	9	9	9	9	9	9	8	9	9	8	9	9	9	9	8	9	8	6	8	9	9	9
DM37	8	8	8	8	8	6	8	8	8	8	8	8	8	8	8	8	6	6	8	6	8	8	8	8	8	8	6
DM38	9	9	8	8	9	9	8	8	9	9	8	8	9	8	8	8	8	8	8	9	9	9	9	9	9	9	8
DM39	9	9	9	9	8	8	8	8	9	8	8	8	9	8	9	8	8	8	6	8	9	9	9	8	9	8	8
DM40	6	6	4	6	9	8	9	9	9	9	8	9	9	9	9	9	9	9	9	9	8	8	8	8	9	9	8
DM41	8	8	8	8	8	8	8	8	8	8	8	8	9	9	8	9	9	8	8	8	8	8	8	8	8	8	8
DM42	9	9	8	8	9	9	8	9	9	9	9	8	9	9	9	9	9	8	8	8	9	9	8	9	9	9	9
DM43	9	9	9	9	9	9	8	9	9	9	9	8	9	9	8	8	9	9	9	8	9	8	9	9	9	8	9
DM44	8	8	8	8	8	9	8	8	6	8	9	8	8	8	8	8	6	8	8	9	8	8	8	8	9	9	9
DM45	9	9	9	8	9	9	9	9	9	9	8	9	9	9	8	9	9	8	9	9	9	9	8	9	9	9	8
DM46	9	9	9	9	9	9	8	8	9	9	8	9	9	9	9	8	9	9	8	8	9	9	8	8	9	9	8
DM47	8	8	8	8	8	8	8	8	9	8	8	6	6	8	8	9	8	8	9	9	9	9	9	9	9	9	8
DM48	8	8	9	9	9	9	8	8	8	8	9	8	9	8	9	9	9	8	8	9	9	8	8	8	8	8	8
DM49	8	8	8	8	8	8	8	8	8	8	8	8	8	8	8	8	8	8	8	8	8	8	8	8	8	8	8
DM50	6	8	8	8	9	9	8	9	8	6	6	8	9	8	8	9	9	4	4	8	4	6	6	6	8	8	8
DM51	9	9	8	9	9	9	8	8	8	8	8	8	9	9	9	9	9	9	9	8	9	9	8	9	9	8	9
DM52	8	6	6	6	6	6	6	6	6	6	6	8	6	6	6	6	6	6	6	6	6	6	6	6	6	6	6
DM53	8	8	8	8	8	8	8	8	8	8	8	8	8	6	8	8	8	8	9	8	6	6	8	6	6	6	6
DM54	8	6	6	6	6	8	6	6	8	6	8	6	6	8	6	8	8	8	6	6	8	8	9	8	8	8	9
DM55	9	9	8	9	9	9	9	9	8	6	8	8	6	6	6	8	6	8	6	8	8	8	8	8	8	8	6
DM56	8	8	8	8	8	8	8	6	8	8	9	6	6	6	8	8	6	6	6	6	8	6	6	6	8	8	6
DM57	8	8	8	8	8	8	8	8	8	9	8	6	8	8	9	9	8	8	9	8	9	9	8	9	9	8	9
DM58	8	8	8	8	8	8	6	9	8	9	9	8	6	6	6	8	8	8	8	8	6	6	6	6	6	6	6
DM59	8	8	8	8	8	8	8	8	8	8	8	8	8	8	8	8	8	8	8	8	6	4	4	8	8	9	8
DM60	8	8	8	9	8	8	6	8	8	8	6	8	8	8	6	9	8	8	8	8	8	8	8	9	9	9	9
DM61	4	4	9	9	9	2	2	9	2	8	8	9	9	9	9	9	9	9	9	9	9	8	9	9	6	9	9
DM62	8	8	8	6	8	9	9	8	9	8	8	9	6	8	8	6	6	8	6	6	8	8	8	8	8	8	8
DM63	6	8	6	6	6	6	6	6	6	6	6	6	6	6	6	6	6	6	8	6	4	6	4	6	4	6	6
DM64	4	6	6	6	8	8	6	6	6	6	6	6	4	4	4	4	6	6	6	6	6	6	6	6	4	4	4
DM65	8	8	8	8	8	8	8	6	6	6	6	6	8	8	8	8	9	9	9	8	9	8	8	8	8	6	6
DM66	9	8	6	6	6	6	4	4	9	9	9	9	8	6	8	9	8	6	8	4	6	4	2	2	6	6	6
DM67	9	9	8	8	9	9	9	9	4	6	9	6	8	9	9	9	9	2	2	2	6	6	6	9	9	9	6
DM68	9	9	9	9	8	8	6	9	9	9	2	2	4	4	6	4	8	8	9	8	9	9	8	8	4	6	8
DM69	6	6	6	6	6	6	6	6	6	6	6	6	6	6	6	6	6	6	6	6	4	4	4	4	8	8	8
DM70	4	4	4	4	4	4	4	2	2	2	2	2	2	2	2	2	4	4	4	4	4	4	4	2	4	2	2
DM71	10	9	8	7	10	6	6	9	6	7	7	9	9	10	5	8	7	8	9	7	7	7	9	7	7	8	9
DM72	10	10	10	10	10	10	10	10	6	6	7	7	7	7	7	7	8	8	8	8	6	7	8	8	7	7	7
DM73	7	5	8	7	6	4	3	5	4	6	4	4	4	4	7	5	4	4	3	3	5	3	8	3	4	4	3
DM74	9	9	7	7	8	7	7	6	5	5	4	3	6	6	5	7	6	3	4	3	7	6	6	5	8	5	5
DM75	2	2	3	3	5	5	4	2	2	2	2	2	5	4	7	6	6	4	2	3	5	6	5	3	1	2	4
DM76	4	3	2	6	9	8	7	7	2	2	8	6	5	9	3	3	10	8	7	7	10	9	8	7	8	5	6
DM77	10	10	5	10	10	9	9	10	2	2	2	2	10	9	8	9	10	8	10	7	10	9	10	10	9	6	5
DM78	10	9	8	9	10	9	8	7	2	2	2	2	10	10	10	10	10	9	9	9	10	10	10	10	10	10	10
DM79	1	3	2	2	1	2	2	2	2	1	2	3	2	1	2	1	1	2	2	2	2	2	2	1	10	10	9
DM80	10	10	10	10	10	9	7	7	2	2	9	2	9	9	8	8	8	8	8	8	10	9	8	9	10	9	10
DM81	10	9	8	8	10	9	9	10	7	6	7	9	10	9	8	8	10	9	9	9	10	9	9	10	10	9	9
DM82	9	9	8	9	9	9	9	9	9	9	9	9	8	8	8	9	9	8	8	8	9	8	8	8	10	7	6
DM83	10	9	9	8	10	9	10	10	10	9	10	9	10	10	10	10	10	10	10	10	10	10	10	10	9	8	9
DM84	10	9	8	9	9	10	8	10	8	10	10	9	3	8	8	9	9	10	9	9	10	10	9	7	7	5	7
DM85	10	10	10	9	7	9	9	10	10	9	8	9	7	8	7	8	10	8	8	9	10	9	7	8	10	8	8
DM86	10	9	8	9	10	8	6	6	8	8	9	9	7	7	7	7	7	8	7	9	9	9	9	9	8	9	9
DM87	9	9	8	8	9	9	10	9	9	9	10	8	6	7	8	9	9	10	10	10	10	9	9	10	10	9	8
DM88	8	7	7	8	10	9	9	10	9	9	8	8	9	8	9	9	9	9	8	8	8	9	8	9	9	8	9
DM89	9	8	9	9	9	8	9	7	6	7	8	7	6	7	7	7	10	9	8	7	10	10	10	10	10	9	9
DM90	9	9	8	8	9	8	9	9	9	8	9	8	9	8	9	9	8	9	8	7	9	9	9	9	8	9	8
DM91	9	8	9	7	10	10	10	9	9	8	7	9	10	9	8	8	10	9	9	9	10	9	8	9	10	9	9
DM92	9	9	9	9	9	9	9	9	9	9	9	9	9	9	9	9	9	9	9	9	9	9	9	9	9	9	9
DM93	8	9	8	9	9	9	9	8	9	9	9	8	8	9	9	8	8	9	9	10	10	9	9	10	9	9	9
DM94	9	9	8	9	9	8	9	9	10	9	9	8	9	9	8	9	10	9	8	9	8	9	8	10	7	8	8
DM95	9	8	8	8	9	8	8	9	8	9	9	9	8	9	9	9	9	9	8	9	10	9	9	8	8	9	10
DM96	8	9	9	8	9	9	8	9	9	8	9	8	9	8	9	8	8	9	8	9	9	9	9	10	8	9	9
DM97	8	9	7	7	9	9	8	8	7	8	9	7	6	7	7	8	7	8	7	8	7	8	8	7	8	8	7
DM98	8	8	8	8	8	8	8	8	8	9	8	9	8	8	9	8	8	7	8	8	8	8	9	8	7	8	9
DM99	8	8	8	8	8	8	8	8	8	8	8	8	8	8	8	8	8	8	8	8	8	8	8	8	8	8	8
DM100	7	8	8	7	8	8	8	8	8	8	8	8	8	8	8	8	8	8	8	8	8	8	8	8	8	8	8
DM101	6	5	5	3	4	5	4	4	3	3	4	4	3	4	4	2	3	3	4	3	3	3	3	4	3	4	3
DM102	8	8	9	9	9	9	8	9	8	8	9	10	9	10	9	9	8	7	8	7	8	7	8	8	7	6	6
DM103	7	7	6	6	6	7	6	6	6	6	7	6	7	7	7	8	6	7	7	7	6	7	7	7	7	8	7
DM104	8	9	8	7	7	7	6	7	7	6	7	6	6	7	7	7	6	7	6	6	6	7	6	7	6	6	7
DM105	6	7	6	6	8	7	8	8	8	8	8	7	8	7	8	8	8	7	8	8	7	7	8	7	7	8	7
DM106	3	6	7	8	8	6	7	5	4	6	7	5	7	7	8	5	4	4	5	6	4	5	6	4	3	5	4
DM107	7	7	5	4	7	6	7	8	7	6	8	6	7	6	5	7	6	5	6	7	6	5	6	8	7	6	8
DM108	3	4	4	5	2	4	5	4	4	4	3	5	4	5	6	4	4	5	4	3	5	5	4	3	3	5	3
DM109	8	8	7	6	8	9	7	6	8	8	8	8	6	7	8	6	10	8	9	7	10	8	7	8	7	8	9
DM110	3	3	4	3	3	4	4	4	5	4	4	4	4	5	6	5	4	6	4	5	4	5	6	3	4	3	4
DM111	4	3	4	5	5	5	4	5	6	5	6	5	4	5	6	7	5	5	4	4	4	5	5	5	4	5	4
DM112	1	2	2	2	6	3	3	3	1	1	1	1	3	1	1	5	3	4	6	2	4	6	6	4	3	2	1
DM113	3	4	3	2	5	4	4	3	4	3	4	5	5	5	5	4	4	4	3	4	5	3	4	5	4	5	5
DM114	3	3	4	4	5	4	3	2	3	2	3	4	4	2	3	2	2	3	2	3	3	3	4	3	3	4	3
DM115	3	4	4	5	5	4	4	4	4	4	5	4	6	5	6	5	3	3	3	2	3	4	3	2	2	3	4
DM116	3	3	4	3	3	3	3	2	3	4	3	5	3	3	3	2	4	4	4	4	3	3	3	3	3	5	4
DM117	7	7	8	8	2	2	2	2	4	4	3	4	4	4	1	2	6	4	3	5	5	5	5	7	9	8	6
DM118	3	3	3	4	1	6	1	1	3	3	8	8	9	6	6	3	6	4	4	4	4	9	9	9	1	1	1
DM119	9	2	2	2	1	1	1	1	3	3	3	3	1	4	4	7	1	1	1	1	1	1	1	1	3	3	6
DM120	1	1	1	1	1	1	1	1	1	1	1	1	1	1	1	1	1	1	1	1	1	1	1	1	1	1	1
DM121	3	3	6	6	7	6	6	6	7	7	7	7	7	7	7	7	6	5	5	6	6	7	7	7	7	7	6
DM122	8	8	8	8	8	8	8	6	6	6	6	6	8	8	8	8	9	9	9	8	9	8	8	8	8	6	6
DM123	9	8	6	6	6	6	4	4	9	9	9	9	8	6	8	9	8	6	8	4	6	4	2	2	6	6	6
DM124	9	9	8	8	9	9	9	9	4	6	9	6	8	9	9	9	9	2	2	2	6	6	6	9	9	9	6
DM125	9	9	9	9	8	8	6	9	9	9	2	2	4	4	6	4	8	8	9	8	9	9	8	8	4	6	8
DM126	6	6	6	6	6	6	6	6	6	6	6	6	6	6	6	6	6	6	6	6	4	4	4	4	8	8	8
DM127	4	4	4	4	4	4	4	2	2	2	2	2	2	2	2	2	4	4	4	4	4	4	4	2	4	2	2
DM128	10	9	8	7	10	6	6	9	6	7	7	9	9	10	5	8	7	8	9	7	7	7	9	7	7	8	9
DM129	10	10	10	10	10	10	10	10	6	6	7	7	7	7	7	7	8	8	8	8	6	7	8	8	7	7	7
DM130	7	5	8	7	6	4	3	5	4	6	4	4	4	4	7	5	4	4	3	3	5	3	8	3	4	4	3
DM131	9	9	7	7	8	7	7	6	5	5	4	3	6	6	5	7	6	3	4	3	7	6	6	5	8	5	5
DM132	2	2	3	3	5	5	4	2	2	2	2	2	5	4	7	6	6	4	2	3	5	6	5	3	1	2	4
DM133	4	3	2	6	9	8	7	7	2	2	8	6	5	9	3	3	10	8	7	7	10	9	8	7	8	5	6
DM134	10	10	5	10	10	9	9	10	2	2	2	2	10	9	8	9	10	8	10	7	10	9	10	10	9	6	5
DM135	10	9	8	9	10	9	8	7	2	2	2	2	10	10	10	10	10	9	9	9	10	10	10	10	10	10	10
DM136	1	3	2	2	1	2	2	2	2	1	2	3	2	1	2	1	1	2	2	2	2	2	2	1	10	10	9
DM137	10	10	10	10	10	9	7	7	2	2	9	2	9	9	8	8	8	8	8	8	10	9	8	9	10	9	10
DM138	10	9	8	8	10	9	9	10	7	6	7	9	10	9	8	8	10	9	9	9	10	9	9	10	10	9	9
DM139	9	9	8	9	9	9	9	9	9	9	9	9	8	8	8	9	9	8	8	8	9	8	8	8	10	7	6
DM140	10	9	9	8	10	9	10	10	10	9	10	9	10	10	10	10	10	10	10	10	10	10	10	10	9	8	9
DM141	10	9	8	9	9	10	8	10	8	10	10	9	3	8	8	9	9	10	9	9	10	10	9	7	7	5	7
DM142	10	10	10	9	7	9	9	10	10	9	8	9	7	8	7	8	10	8	8	9	10	9	7	8	10	8	8
DM143	10	9	8	9	10	8	6	6	8	8	9	9	7	7	7	7	7	8	7	9	9	9	9	9	8	9	9
DM144	9	9	8	8	9	9	10	9	9	9	10	8	6	7	8	9	9	10	10	10	10	9	9	10	10	9	8
DM145	8	7	7	8	10	9	9	10	9	9	8	8	9	8	9	9	9	9	8	8	8	9	8	9	9	8	9
DM146	9	8	9	9	9	8	9	7	6	7	8	7	6	7	7	7	10	9	8	7	10	10	10	10	10	9	9
DM147	9	9	8	8	9	8	9	9	9	8	9	8	9	8	9	9	8	9	8	7	9	9	9	9	8	9	8
DM148	9	8	9	7	10	10	10	9	9	8	7	9	10	9	8	8	10	9	9	9	10	9	8	9	10	9	9
DM149	4	4	4	8	9	8	9	9	8	6	9	8	9	9	9	9	9	8	8	8	9	9	9	9	9	6	8
DM150	9	6	8	9	8	9	6	9	8	4	8	4	9	9	9	9	2	2	2	2	2	2	2	2	2	2	2
DM151	8	8	8	8	6	6	8	8	9	9	9	9	8	8	9	8	8	8	8	8	8	6	9	6	8	8	9
DM152	8	8	8	9	8	8	8	8	8	8	8	8	9	9	9	9	9	8	9	8	8	8	9	8	8	8	8
DM153	9	9	8	9	9	9	9	9	9	8	8	9	6	6	6	6	6	8	8	8	8	6	6	6	6	6	6
DM154	6	6	8	8	6	8	8	8	6	8	6	6	8	8	8	8	9	8	9	9	8	8	8	8	8	8	8
DM155	8	8	8	8	8	8	8	8	8	8	8	8	8	8	8	8	6	8	6	8	8	8	8	8	8	8	8
DM156	6	8	6	8	4	4	6	9	9	8	9	8	6	6	6	6	8	6	6	6	8	8	6	8	9	9	8
DM157	8	8	8	8	9	9	8	8	8	6	8	6	9	6	6	8	4	6	6	8	9	9	9	9	8	8	8
DM158	4	6	6	8	4	6	6	8	8	8	9	9	8	8	9	8	9	9	9	9	8	9	9	9	8	8	6
DM159	9	9	9	8	9	8	9	9	8	9	8	8	8	8	9	9	9	9	9	9	9	9	9	9	9	9	9
DM160	7	8	8	7	8	8	8	8	8	8	8	8	8	8	8	8	8	8	8	8	8	8	8	8	8	8	8
DM161	6	5	5	3	4	5	4	4	3	3	4	4	3	4	4	2	3	3	4	3	3	3	3	4	3	4	3
DM162	8	8	9	9	9	9	8	9	8	8	9	10	9	10	9	9	8	7	8	7	8	7	8	8	7	6	6
DM163	7	7	6	6	6	7	6	6	6	6	7	6	7	7	7	8	6	7	7	7	6	7	7	7	7	8	7
DM164	8	9	8	7	7	7	6	7	7	6	7	6	6	7	7	7	6	7	6	6	6	7	6	7	6	6	7
DM165	6	7	6	6	8	7	8	8	8	8	8	7	8	7	8	8	8	7	8	8	7	7	8	7	7	8	7
DM166	3	6	7	8	8	6	7	5	4	6	7	5	7	7	8	5	4	4	5	6	4	5	6	4	3	5	4
DM167	7	7	5	4	7	6	7	8	7	6	8	6	7	6	5	7	6	5	6	7	6	5	6	8	7	6	8
DM168	3	4	4	5	2	4	5	4	4	4	3	5	4	5	6	4	4	5	4	3	5	5	4	3	3	5	3
DM169	8	8	7	6	8	9	7	6	8	8	8	8	6	7	8	6	10	8	9	7	10	8	7	8	7	8	9
DM170	3	3	4	3	3	4	4	4	5	4	4	4	4	5	6	5	4	6	4	5	4	5	6	3	4	3	4
DM171	4	8	8	6	8	6	6	6	8	6	6	6	6	4	6	8	6	6	6	6	6	6	4	6	8	6	8
DM172	8	4	6	6	6	6	8	8	4	6	6	6	6	6	8	6	6	8	6	6	6	8	6	6	6	8	8
DM173	4	6	6	6	4	4	6	4	8	4	6	4	8	4	6	4	8	4	4	6	8	4	4	4	8	4	4
DM174	6	4	6	6	8	4	6	4	8	6	4	6	4	6	6	4	8	8	8	6	8	8	4	4	8	6	4
DM175	6	6	6	6	4	4	6	4	8	4	4	6	4	4	6	8	8	4	4	6	4	6	8	6	8	4	6
DM176	6	6	8	6	6	6	6	8	6	6	6	6	6	6	6	8	6	8	8	6	6	8	6	8	6	8	6
DM177	6	6	8	6	4	6	8	6	4	6	4	6	4	4	8	4	8	6	6	6	6	6	6	6	8	6	6
DM178	4	6	6	6	8	6	8	6	6	6	6	6	6	6	6	6	6	6	6	6	6	6	6	6	6	6	6
DM179	4	6	6	6	6	6	6	8	8	6	6	6	6	6	6	6	6	6	6	6	6	6	6	8	6	6	8
DM180	4	6	6	6	6	8	6	8	6	6	8	6	6	6	6	6	6	8	6	8	6	8	6	6	6	8	8
DM181	6	6	6	6	6	6	6	6	6	6	6	6	6	6	6	6	6	6	6	6	6	6	6	6	6	6	6
DM182	6	6	6	8	6	6	6	6	8	8	6	6	8	8	6	8	6	6	8	6	8	8	6	6	6	4	6
DM183	4	6	8	6	6	6	6	6	8	6	6	6	6	6	6	6	6	8	8	6	6	6	6	8	6	6	6
DM184	4	6	6	6	4	6	6	6	6	6	6	6	6	6	4	6	6	6	6	6	6	6	6	8	6	8	6
DM185	9	9	8	9	8	7	8	9	9	9	5	6	7	8	6	6	6	7	8	7	9	2	2	5	6	5	6
DM186	6	6	7	7	7	6	5	5	6	6	5	6	8	9	9	9	8	8	8	8	8	7	7	6	5	5	5
DM187	5	5	6	5	4	4	5	5	4	4	4	4	5	4	4	4	5	4	4	5	5	4	3	2	3	4	3
DM188	6	6	6	7	6	8	6	6	6	7	7	6	7	7	7	6	9	9	8	7	6	7	6	7	7	8	8
DM189	7	6	7	6	5	6	6	5	5	4	6	5	5	7	7	6	6	6	6	6	6	6	6	5	5	5	7
DM190	5	6	7	4	7	6	8	6	5	5	5	5	5	5	4	5	4	6	6	7	4	4	5	4	7	7	6
DM191	5	6	8	9	8	8	7	8	10	9	9	6	8	8	8	9	8	10	10	9	9	9	9	9	10	10	9
DM192	10	2	2	9	9	10	10	9	10	10	9	8	10	10	10	10	9	10	9	7	1	1	1	1	8	10	9
DM193	4	3	3	8	2	3	4	2	3	4	5	5	7	8	7	6	6	8	7	9	4	2	3	2	5	7	6
DM194	4	4	4	4	10	6	5	4	3	3	3	3	2	2	2	2	5	5	5	5	5	4	3	2	2	2	4
DM195	5	6	4	4	7	6	7	6	8	7	8	8	8	6	6	6	7	8	8	7	8	8	7	8	7	8	8
DM196	10	8	8	9	8	9	9	8	7	8	8	9	8	9	9	9	8	9	9	9	8	9	9	9	2	2	2
DM197	10	8	10	5	10	4	4	10	7	8	8	6	9	10	4	5	10	10	10	9	10	9	9	4	4	6	4
DM198	8	9	7	7	10	6	4	8	10	8	9	8	10	9	8	8	10	8	6	4	10	9	10	9	8	8	7
DM199	6	8	2	2	9	9	10	9	9	9	8	10	8	7	5	6	9	8	7	7	10	10	10	10	9	8	8
DM200	3	3	4	3	3	4	4	4	5	4	4	4	4	5	6	5	4	6	4	5	4	5	6	3	4	3	4
DM201	4	8	8	6	8	6	6	6	8	6	6	6	6	4	6	8	6	6	6	6	6	6	4	6	8	6	8
DM202	8	4	6	6	6	6	8	8	4	6	6	6	6	6	8	6	6	8	6	6	6	8	6	6	6	8	8
DM203	4	6	6	6	4	4	6	4	8	4	6	4	8	4	6	4	8	4	4	6	8	4	4	4	8	4	4
DM204	6	4	6	6	8	4	6	4	8	6	4	6	4	6	6	4	8	8	8	6	8	8	4	4	8	6	4
DM205	6	6	6	6	4	4	6	4	8	4	4	6	4	4	6	8	8	4	4	6	4	6	8	6	8	4	6
DM206	6	6	8	6	6	6	6	8	6	6	6	6	6	6	6	8	6	8	8	6	6	8	6	8	6	8	6
DM207	6	6	8	6	4	6	8	6	4	6	4	6	4	4	8	4	8	6	6	6	6	6	6	6	8	6	6
DM208	9	8	6	6	6	6	4	4	9	9	9	9	8	6	8	9	8	6	8	4	6	4	2	2	6	6	6
DM209	9	10	10	10	10	9	8	9	10	10	10	10	10	10	9	9	9	8	8	10	10	10	10	9	8	10	9
DM210	8	8	9	10	5	6	6	9	10	9	9	10	9	9	8	9	9	8	10	9	6	5	7	6	6	6	7
DM211	9	9	10	10	9	9	10	8	9	9	10	10	9	10	9	10	9	10	10	9	10	9	9	10	9	9	9
DM212	8	9	10	9	9	10	9	7	9	8	10	9	9	9	10	9	9	8	8	9	9	10	10	10	9	8	10
DM213	8	8	8	8	9	9	8	8	8	6	8	6	9	6	6	8	4	6	6	8	9	9	9	9	8	8	8
DM214	4	6	6	8	4	6	6	8	8	8	9	9	8	8	9	8	9	9	9	9	8	9	9	9	8	8	6
DM215	9	9	9	8	9	8	9	9	8	9	8	8	8	8	9	9	9	9	9	9	9	9	9	9	9	9	9
DM216	6	6	6	2	4	2	4	4	4	4	4	4	8	6	6	4	2	4	4	6	8	6	4	2	2	4	4
DM217	4	8	8	9	6	4	6	9	8	4	8	9	6	8	8	8	8	6	8	6	8	8	4	8	8	6	8
DM218	4	6	6	8	8	9	9	8	4	6	6	8	6	6	6	6	9	9	9	9	9	9	9	8	8	9	9
DM219	9	8	8	2	6	6	4	4	8	8	8	8	8	8	6	8	9	9	9	9	9	9	6	9	9	9	6
DM220	9	9	8	9	9	9	9	9	9	9	9	9	9	9	9	8	8	9	8	9	6	9	9	9	9	9	9
DM221	9	9	8	10	7	9	10	10	9	7	7	7	8	10	9	7	9	9	10	10	10	10	10	10	10	9	9
DM222	5	5	2	3	2	3	4	3	3	4	4	4	6	5	4	3	3	4	6	9	6	3	1	1	3	4	5
DM223	7	8	10	4	4	5	10	10	4	8	9	8	7	8	8	7	6	7	5	7	8	4	7	7	6	7	7
DM224	5	5	7	7	9	10	8	9	5	6	7	8	5	5	5	7	10	10	10	10	9	9	8	8	9	9	8
DM225	8	7	2	4	6	4	3	6	8	8	8	8	7	6	8	9	9	9	10	9	10	5	10	9	9	6	7
DM226	9	8	9	7	9	9	10	10	9	10	10	8	9	9	7	8	9	8	9	10	9	10	9	9	10	9	9
DM227	9	10	10	10	10	9	8	9	10	10	10	10	10	10	9	9	9	8	8	10	10	10	10	9	8	10	9
DM228	8	8	9	10	5	6	6	9	10	9	9	10	9	9	8	9	9	8	10	9	6	5	7	6	6	6	7
DM229	9	9	10	10	9	9	10	8	9	9	10	10	9	10	9	10	9	10	10	9	10	9	9	10	9	9	9
DM230	8	9	10	9	9	10	9	7	9	8	10	9	9	9	10	9	9	8	8	9	9	10	10	10	9	8	10
DM231	9	10	9	9	6	7	8	10	10	8	8	9	9	9	10	9	8	10	10	9	9	9	10	9	8	8	8
DM232	9	9	10	9	9	9	9	9	9	9	9	7	10	7	5	5	7	6	7	8	10	10	10	10	10	8	9
DM233	10	9	9	9	10	10	9	9	9	9	9	9	10	9	8	9	9	9	10	8	10	10	9	10	9	9	9
DM234	10	8	10	9	10	9	9	10	9	10	6	7	9	10	5	4	9	10	10	10	9	7	6	10	8	9	9

## Sheet: DETECTION
FM	acc1	acc2	acc3	acc4	ns1	ns2	ns3	ns4	dinf1	dinf2	dinf3	dinf4	inf1	inf2	inf3	inf4	sm1	sm2	sm3	sm4	idm1	idm2	idm4	cs1	cs2	cs3
DM1	9	9	9	7	9	9	8	5	6	7	7	7	6	3	3	4	4	4	4	3	2	2	8	2	2	2
DM2	4	3	4	3	4	4	3	5	5	5	5	5	5	4	6	6	3	3	3	3	3	3	4	4	3	4
DM3	2	2	2	3	4	4	4	4	3	4	5	6	5	4	3	5	3	4	5	5	5	3	5	4	5	4
DM4	2	5	4	4	2	3	2	2	1	2	4	4	3	4	6	3	1	5	1	4	3	3	6	2	2	7
DM5	7	6	5	7	4	6	4	7	7	8	5	7	5	4	6	7	4	7	8	6	7	8	5	8	6	8
DM6	8	8	7	7	7	7	7	7	7	7	7	7	6	6	6	6	6	7	6	7	6	7	7	6	6	7
DM7	2	3	4	3	2	3	4	3	3	4	2	6	3	5	3	3	3	4	3	6	3	3	5	2	3	7
DM8	5	6	6	7	4	4	4	3	5	6	5	6	5	7	6	5	5	5	6	6	6	6	5	7	5	6
DM9	1	1	1	1	1	1	1	1	1	1	1	1	1	1	1	1	1	1	1	1	1	1	1	1	1	1
DM10	1	1	3	5	1	1	1	2	3	4	3	5	5	3	5	3	5	4	3	4	2	4	6	5	4	6
DM11	2	2	2	2	1	3	3	4	2	3	2	3	4	3	2	3	4	4	4	1	1	2	3	1	1	2
DM12	3	3	5	4	3	2	3	4	5	5	3	4	4	4	5	4	2	3	2	3	3	2	1	4	3	1
DM13	2	3	2	3	2	2	2	3	4	4	4	1	1	1	2	3	2	3	3	3	3	3	3	2	2	3
DM14	2	2	2	2	2	2	2	2	2	2	2	2	3	5	6	5	2	2	2	6	3	2	2	2	7	6
DM15	4	4	5	4	5	6	5	5	4	4	4	5	4	3	3	3	3	3	3	4	3	3	3	4	3	4
DM16	4	5	6	3	2	2	3	2	2	5	4	7	4	4	4	5	3	5	4	4	5	2	2	2	5	4
DM17	3	4	4	3	3	2	2	4	3	3	3	4	4	4	4	5	4	3	4	2	3	3	2	1	1	1
DM18	6	4	6	5	8	8	8	6	8	6	7	7	10	10	9	8	9	10	8	8	10	6	6	7	9	9
DM19	1	2	2	4	3	3	1	1	2	1	2	9	1	2	1	1	1	3	2	2	1	1	1	1	1	2
DM20	10	9	8	7	10	6	6	9	6	7	7	9	9	10	5	8	7	8	9	7	7	7	9	7	8	9
DM21	10	10	10	10	10	10	10	10	6	6	7	7	7	7	7	7	8	8	8	8	6	7	8	7	7	7
DM22	7	5	8	7	6	4	3	5	4	6	4	4	4	4	7	5	4	4	3	3	5	3	8	4	4	3
DM23	9	9	7	7	8	7	7	6	5	5	4	3	6	6	5	7	6	3	4	3	7	6	6	8	5	5
DM24	2	2	3	3	5	5	4	2	2	2	2	2	5	4	7	6	6	4	2	3	5	6	5	1	2	4
DM25	4	3	2	6	9	8	7	7	2	2	8	6	5	9	3	3	10	8	7	7	10	9	8	8	5	6
DM26	10	10	5	10	10	9	9	10	2	2	2	2	10	9	8	9	10	8	10	7	10	9	10	9	6	5
DM27	10	9	8	9	10	9	8	7	2	2	2	2	10	10	10	10	10	9	9	9	10	10	10	10	10	10
DM28	1	3	2	2	1	2	2	2	2	1	2	3	2	1	2	1	1	2	2	2	2	2	2	10	10	9
DM29	10	10	10	10	10	9	7	7	2	2	9	2	9	9	8	8	8	8	8	8	10	9	8	10	9	10
DM30	10	9	8	8	10	9	9	10	7	6	7	9	10	9	8	8	10	9	9	9	10	9	9	10	9	9
DM31	9	9	8	9	9	9	9	9	9	9	9	9	8	8	8	9	9	8	8	8	9	8	8	10	7	6
DM32	10	9	9	8	10	9	10	10	10	9	10	9	10	10	10	10	10	10	10	10	10	10	10	9	8	9
DM33	10	9	8	9	9	10	8	10	8	10	10	9	3	8	8	9	9	10	9	9	10	10	9	7	5	7
DM34	10	10	10	9	7	9	9	10	10	9	8	9	7	8	7	8	10	8	8	9	10	9	7	10	8	8
DM35	10	9	8	9	10	8	6	6	8	8	9	9	7	7	7	7	7	8	7	9	9	9	9	8	9	9
DM36	9	9	8	8	9	9	10	9	9	9	10	8	6	7	8	9	9	10	10	10	10	9	9	10	9	8
DM37	8	7	7	8	10	9	9	10	9	9	8	8	9	8	9	9	9	9	8	8	8	9	8	9	8	9
DM38	9	8	9	9	9	8	9	7	6	7	8	7	6	7	7	7	10	9	8	7	10	10	10	10	9	9
DM39	9	9	8	8	9	8	9	9	9	8	9	8	9	8	9	9	8	9	8	7	9	9	9	8	9	8
DM40	9	8	9	7	10	10	10	9	9	8	7	9	10	9	8	8	10	9	9	9	10	9	8	10	9	9
DM41	9	9	9	9	9	9	9	9	9	9	9	9	9	9	9	9	9	9	9	9	9	9	9	9	9	9
DM42	8	9	8	9	9	9	9	8	9	9	9	8	8	9	9	8	8	9	9	10	10	9	9	9	9	9
DM43	9	9	8	9	9	8	9	9	10	9	9	8	9	9	8	9	10	9	8	9	8	9	8	7	8	8
DM44	9	8	8	8	9	8	8	9	8	9	9	9	8	9	9	9	9	9	8	9	10	9	9	8	9	10
DM45	8	9	9	8	9	9	8	9	9	8	9	8	9	8	9	8	8	9	8	9	9	9	9	8	9	9
DM46	8	9	7	7	9	9	8	8	7	8	9	7	6	7	7	8	7	8	7	8	7	8	8	8	8	7
DM47	8	8	8	8	8	8	8	8	8	9	8	9	8	8	9	8	8	7	8	8	8	8	9	7	8	9
DM48	8	8	8	8	8	8	8	8	8	8	8	8	8	8	8	8	8	8	8	8	8	8	8	8	8	8
DM49	7	8	8	7	8	8	8	8	8	8	8	8	8	8	8	8	8	8	8	8	8	8	8	8	8	8
DM50	6	5	5	3	4	5	4	4	3	3	4	4	3	4	4	2	3	3	4	3	3	3	3	3	4	3
DM51	8	8	9	9	9	9	8	9	8	8	9	10	9	10	9	9	8	7	8	7	8	7	8	7	6	6
DM52	7	7	6	6	6	7	6	6	6	6	7	6	7	7	7	8	6	7	7	7	6	7	7	7	8	7
DM53	8	9	8	7	7	7	6	7	7	6	7	6	6	7	7	7	6	7	6	6	6	7	6	6	6	7
DM54	6	7	6	6	8	7	8	8	8	8	8	7	8	7	8	8	8	7	8	8	7	7	8	7	8	7
DM55	3	6	7	8	8	6	7	5	4	6	7	5	7	7	8	5	4	4	5	6	4	5	6	3	5	4
DM56	7	7	5	4	7	6	7	8	7	6	8	6	7	6	5	7	6	5	6	7	6	5	6	7	6	8
DM57	3	4	4	5	2	4	5	4	4	4	3	5	4	5	6	4	4	5	4	3	5	5	4	3	5	3
DM58	8	8	7	6	8	9	7	6	8	8	8	8	6	7	8	6	10	8	9	7	10	8	7	7	8	9
DM59	3	3	4	3	3	4	4	4	5	4	4	4	4	5	6	5	4	6	4	5	4	5	6	4	3	4
DM60	4	3	4	5	5	5	4	5	6	5	6	5	4	5	6	7	5	5	4	4	4	5	5	4	5	4
DM61	1	2	2	2	6	3	3	3	1	1	1	1	3	1	1	5	3	4	6	2	4	6	6	3	2	1
DM62	3	4	3	2	5	4	4	3	4	3	4	5	5	5	5	4	4	4	3	4	5	3	4	4	5	5
DM63	3	3	4	4	5	4	3	2	3	2	3	4	4	2	3	2	2	3	2	3	3	3	4	3	4	3
DM64	3	4	4	5	5	4	4	4	4	4	5	4	6	5	6	5	3	3	3	2	3	4	3	2	3	4
DM65	3	3	4	3	3	3	3	2	3	4	3	5	3	3	3	2	4	4	4	4	3	3	3	3	5	4
DM66	7	7	8	8	2	2	2	2	4	4	3	4	4	4	1	2	6	4	3	5	5	5	5	9	8	6
DM67	3	3	3	4	1	6	1	1	3	3	8	8	9	6	6	3	6	4	4	4	4	9	9	1	1	1
DM68	9	2	2	2	1	1	1	1	3	3	3	3	1	4	4	7	1	1	1	1	1	1	1	3	3	6
DM69	1	1	1	1	1	1	1	1	1	1	1	1	1	1	1	1	1	1	1	1	1	1	1	1	1	1
DM70	3	3	6	6	7	6	6	6	7	7	7	7	7	7	7	7	6	5	5	6	6	7	7	7	7	6
DM71	7	7	6	6	6	6	6	6	6	3	6	6	6	3	6	6	6	6	3	6	3	6	6	7	6	6
DM72	3	3	3	3	3	3	3	3	3	3	3	3	3	6	3	6	6	3	3	3	3	3	3	3	3	3
DM73	1	1	1	1	1	3	1	3	3	3	1	1	1	1	3	1	1	1	1	6	6	3	1	1	1	1
DM74	7	6	7	7	7	6	3	7	3	3	6	6	3	6	3	6	3	3	3	3	3	6	6	6	3	6
DM75	6	6	6	6	6	6	6	7	7	7	6	6	7	7	6	6	6	6	7	7	6	6	6	7	6	6
DM76	3	6	6	6	6	6	3	6	7	3	3	7	6	6	6	7	3	3	6	6	6	3	7	3	6	3
DM77	7	6	7	6	6	6	6	6	6	3	6	6	6	7	7	6	6	6	6	6	6	6	6	6	6	7
DM78	6	6	7	3	7	6	6	6	6	6	6	6	6	6	3	6	3	6	6	7	3	3	6	7	7	6
DM79	6	6	6	6	6	6	7	6	7	6	6	6	6	6	6	6	6	7	7	6	6	6	6	7	7	6
DM80	7	6	7	6	6	3	6	6	6	6	6	7	6	6	6	6	7	3	6	6	6	6	6	6	6	7
DM81	6	6	6	6	6	3	3	3	6	7	6	6	6	6	6	6	6	6	6	6	6	7	6	6	7	6
DM82	6	6	6	6	6	6	6	6	6	6	6	6	6	6	6	7	6	6	6	6	6	7	6	7	7	7
DM83	3	6	6	7	3	6	6	6	6	6	3	6	6	6	6	6	6	6	7	6	6	7	6	6	7	6
DM84	6	7	7	7	7	7	7	7	7	7	6	6	6	6	6	6	6	7	6	6	7	6	6	6	6	6
DM85	7	3	6	6	6	7	6	7	6	6	6	7	7	6	6	7	6	7	6	6	6	7	6	6	6	6
DM86	6	3	6	6	6	6	7	7	7	7	7	6	6	6	6	6	7	7	7	7	6	6	6	6	6	6
DM87	7	6	6	7	6	7	6	6	6	6	7	6	6	7	7	6	6	6	6	6	7	6	7	7	7	7
DM88	7	7	6	6	6	6	6	6	7	6	6	6	7	6	3	6	6	7	6	6	6	6	6	6	7	6
DM89	7	7	6	7	6	6	6	3	3	6	3	7	3	6	3	7	6	6	3	3	6	7	7	7	7	7
DM90	6	6	6	6	6	6	6	7	7	7	6	6	7	7	6	6	6	6	7	7	6	6	6	7	6	6
DM91	3	3	6	6	6	6	3	6	7	3	3	7	6	6	6	7	3	3	6	6	6	3	7	3	6	3
DM92	7	6	7	6	6	6	6	6	6	3	6	6	6	7	7	6	6	6	6	6	6	6	6	6	6	7
DM93	6	6	6	6	6	6	7	7	6	6	6	6	6	6	7	6	6	7	6	6	6	7	6	6	7	7
DM94	7	7	7	6	6	6	6	6	7	6	6	6	7	6	6	6	7	6	6	6	7	6	6	7	6	6
DM95	6	3	3	3	7	6	6	6	7	6	6	6	6	6	6	6	7	7	7	6	7	7	6	7	6	6
DM96	7	7	6	6	6	6	6	6	7	6	6	6	6	6	6	7	7	6	6	6	6	6	7	7	6	6
DM97	6	7	7	6	6	6	6	7	6	6	6	6	6	6	6	7	6	7	7	6	6	7	6	6	7	6
DM98	6	6	7	3	7	6	6	6	6	6	6	6	6	6	3	6	3	6	6	7	3	3	6	7	7	6
DM99	6	6	6	6	6	6	7	6	7	6	6	6	6	6	6	6	6	7	7	6	6	6	6	7	7	6
DM100	7	6	7	6	6	3	6	6	6	6	6	7	6	6	6	6	7	3	6	6	6	6	6	6	6	7
DM101	6	6	6	6	6	6	7	6	6	6	6	6	7	7	6	6	7	6	6	6	6	6	6	6	6	7
DM102	6	6	6	7	6	6	6	7	6	6	6	7	6	6	7	7	6	7	6	6	6	6	6	6	6	6
DM103	7	7	7	7	7	6	6	6	7	6	6	6	6	6	6	7	6	6	6	6	6	6	3	7	6	7
DM104	7	6	6	6	6	6	7	7	6	6	6	6	6	6	7	6	6	7	6	6	6	7	6	6	7	7
DM105	3	3	3	7	7	7	6	7	7	6	6	6	6	7	7	7	7	6	7	6	6	7	7	6	6	6
DM106	7	6	7	6	7	6	6	7	7	3	7	3	7	7	7	7	1	1	1	1	1	1	1	1	1	1
DM107	7	7	7	7	6	6	7	6	6	6	6	6	6	6	6	6	7	6	7	7	7	6	6	6	6	6
DM108	7	7	6	6	6	6	6	7	6	7	7	6	6	6	6	6	6	6	6	6	6	6	6	7	6	6
DM109	6	6	6	6	6	6	6	6	6	6	6	6	6	6	6	6	6	7	7	7	7	6	6	6	6	6
DM110	6	6	7	7	6	7	7	7	6	7	6	6	6	6	6	6	6	6	6	7	6	6	7	6	6	7
DM111	7	7	6	6	6	6	6	6	6	6	6	6	7	6	7	6	6	6	6	7	6	7	7	7	7	7
DM112	6	7	6	7	3	3	6	6	6	6	6	6	6	6	6	6	7	6	6	6	7	7	6	6	6	6
DM113	7	6	6	7	6	6	6	6	6	7	7	7	6	3	3	3	3	3	3	3	1	1	6	1	1	1
DM114	3	3	3	3	3	3	3	6	6	6	6	6	6	3	6	6	3	3	3	3	3	3	3	3	3	3
DM115	1	1	1	3	3	3	3	3	3	3	6	6	6	3	3	6	3	3	6	6	6	3	6	3	6	3
DM116	1	6	3	3	1	3	1	1	1	1	3	3	3	3	6	3	1	6	1	3	3	3	6	1	1	7
DM117	7	6	6	7	3	6	3	7	7	6	6	7	6	3	6	7	3	7	6	6	7	6	6	6	6	6
DM118	6	6	7	7	7	7	7	7	7	7	7	7	6	6	6	6	6	7	6	7	6	7	7	6	6	7
DM119	1	3	3	3	1	3	3	3	3	3	1	6	3	6	3	3	3	3	3	6	3	3	6	1	3	7
DM120	6	6	6	7	3	3	3	3	6	6	6	6	6	7	6	6	6	6	6	6	6	6	6	7	6	6
DM121	6	1	1	3	3	6	6	3	1	1	1	1	1	6	3	7	6	6	3	1	3	6	6	3	1	1
DM122	6	3	3	1	6	6	6	7	6	1	1	6	7	6	6	3	1	7	6	7	6	7	6	7	6	6
DM123	7	6	6	6	7	7	6	6	6	1	1	1	1	7	6	6	1	7	6	7	7	7	6	7	6	6
DM124	6	6	6	6	6	7	6	6	7	1	1	1	1	7	7	7	6	7	6	6	6	7	7	7	7	7
DM125	6	3	3	1	1	1	1	1	1	1	1	1	1	1	1	1	1	1	1	1	1	1	1	1	7	7
DM126	6	6	6	6	7	7	6	7	6	1	1	6	1	6	6	6	6	6	6	6	6	7	6	6	7	6
DM127	6	6	6	6	7	7	6	6	7	7	6	7	6	7	6	6	7	7	6	6	7	7	6	7	7	6
DM128	6	6	6	6	6	6	6	6	6	6	6	6	6	6	6	6	6	6	6	6	6	6	6	6	7	7
DM129	6	6	6	6	7	7	6	7	7	7	6	7	7	7	7	7	7	7	7	7	7	7	7	7	6	6
DM130	6	6	6	6	6	3	7	6	7	6	7	7	3	3	6	6	6	3	7	3	3	7	7	7	7	6
DM131	6	6	6	6	3	7	3	3	7	7	6	6	6	7	6	7	7	7	6	6	7	7	6	6	7	6
DM132	6	6	6	6	7	7	6	6	6	6	6	6	7	7	7	7	7	7	6	7	6	6	6	6	6	6
DM133	1	1	1	1	1	3	1	3	3	3	1	1	1	1	3	1	1	1	1	6	6	3	1	1	1	1
DM134	7	6	7	7	7	6	3	7	3	3	6	6	3	6	3	6	3	3	3	3	3	6	6	6	3	6
DM135	6	6	6	6	6	6	6	7	7	7	6	6	7	7	6	6	6	6	7	7	6	6	6	7	6	6
DM136	3	3	6	6	6	6	3	6	7	3	3	7	6	6	6	7	3	3	6	6	6	3	7	3	6	3
DM137	7	6	7	6	6	6	6	6	6	3	6	6	6	7	7	6	6	6	6	6	6	6	6	6	6	7
DM138	6	6	7	3	7	6	6	6	6	6	6	6	6	6	3	6	3	6	6	7	3	3	6	7	7	6
DM139	6	6	6	6	6	6	7	6	7	6	6	6	6	6	6	6	6	7	7	6	6	6	6	7	7	6
DM140	6	6	7	6	6	3	6	6	6	6	6	7	6	6	6	6	7	3	6	6	6	6	6	6	6	7
DM141	6	3	3	6	6	6	6	6	6	6	6	6	6	6	6	6	6	6	6	6	6	7	6	7	6	6
DM142	7	6	6	6	6	6	6	6	6	7	6	6	6	6	6	6	6	7	6	6	6	6	6	7	7	6
DM143	7	7	6	6	6	6	6	6	6	6	6	6	6	6	6	6	6	6	6	6	6	7	6	6	6	6
DM144	6	6	6	6	6	6	6	6	6	6	6	6	6	6	6	6	7	6	6	6	7	6	6	7	6	6
DM145	6	6	6	7	6	6	6	6	7	7	6	6	6	6	7	7	6	7	6	7	7	7	6	7	6	6
DM146	6	6	6	6	6	6	6	6	6	6	6	6	6	6	6	6	6	6	7	6	6	6	6	6	7	6
DM147	6	6	6	6	6	6	6	6	6	6	6	6	6	6	6	6	6	6	6	6	6	6	6	6	6	6
DM148	6	6	6	6	6	6	6	6	7	6	6	6	7	6	6	7	6	6	6	7	7	6	6	7	6	7
DM149	7	6	6	6	6	7	6	7	7	7	6	6	7	6	6	6	6	7	6	6	7	6	6	7	6	6
DM150	6	7	7	7	6	3	3	3	3	3	3	3	3	3	3	6	3	3	6	3	6	6	6	6	6	6
DM151	3	6	6	6	3	6	6	7	3	6	6	6	6	3	6	3	3	6	7	6	6	6	3	6	6	3
DM152	6	6	6	7	7	3	6	6	6	6	7	7	6	6	7	7	3	7	3	3	3	7	7	7	7	7
DM153	6	3	3	6	1	1	6	1	6	1	3	6	3	1	6	1	1	1	1	1	1	1	1	1	1	3
DM154	6	6	6	7	6	6	3	3	6	6	6	3	6	6	7	6	6	6	6	6	6	7	3	3	7	3
DM155	3	6	6	6	6	3	3	3	6	6	3	3	6	3	3	6	7	7	6	6	7	7	6	7	7	6
DM156	6	6	6	6	7	7	6	6	6	3	7	3	3	6	7	6	6	6	6	6	6	6	6	6	7	7
DM157	3	1	1	1	1	7	6	3	7	1	3	3	7	3	3	7	7	7	7	7	7	7	7	7	6	6
DM158	6	6	6	6	3	6	6	6	6	7	6	6	6	6	1	6	6	6	7	6	6	7	7	7	7	6
DM159	7	3	6	6	6	6	6	6	3	3	6	6	6	6	6	7	7	7	6	6	7	7	6	6	7	6
DM160	3	6	6	1	1	1	1	3	3	6	6	1	7	3	3	7	7	7	6	7	6	6	6	6	6	6
DM161	6	6	6	1	7	6	6	6	7	6	7	6	6	6	6	7	3	3	6	6	6	3	7	3	6	3
DM162	7	6	6	6	6	7	6	6	6	6	6	6	7	6	6	6	6	7	6	7	6	1	1	6	6	6
DM163	6	6	7	7	7	6	6	6	6	6	6	6	6	6	6	6	6	6	6	6	6	7	7	6	6	6
DM164	6	6	6	6	3	3	6	6	3	3	3	3	6	3	3	3	6	3	3	6	6	3	3	3	3	3
DM165	6	6	6	7	6	6	6	6	6	7	7	6	7	7	7	6	6	6	6	7	6	7	6	7	6	6
DM166	7	6	7	6	6	6	6	6	6	3	6	6	6	7	7	6	6	6	6	6	6	6	6	6	6	7
DM167	6	6	7	3	7	6	6	6	6	6	6	6	6	6	3	6	3	6	6	7	3	3	6	7	7	6
DM168	6	6	6	6	6	6	7	6	7	6	6	6	6	6	6	6	6	7	7	6	6	6	6	7	7	6
DM169	7	1	1	6	6	7	7	6	7	7	6	6	7	7	7	7	6	7	6	7	1	1	1	6	7	6
DM170	7	6	6	7	6	7	6	6	6	6	7	6	6	7	7	6	6	6	6	6	7	6	7	7	7	7
DM171	6	6	6	3	6	6	6	6	7	6	6	6	7	6	3	6	6	7	6	6	6	6	6	6	7	6
DM172	7	6	6	7	6	6	6	3	3	6	3	7	3	6	3	66	6	6	3	3	6	7	7	7	7	7
DM173	6	6	6	6	6	6	6	7	7	7	6	6	7	7	6	6	6	6	7	7	6	6	6	7	6	6
DM174	3	6	7	6	6	6	3	6	7	3	3	7	6	6	6	7	3	3	6	6	6	3	7	3	6	3
DM175	7	6	7	6	6	6	6	6	6	3	6	6	6	7	7	6	6	6	6	6	6	6	6	6	6	7
DM176	7	6	6	6	6	6	7	7	6	6	6	6	6	6	7	6	6	7	6	6	6	7	6	6	7	7
DM177	7	7	7	7	7	6	6	6	7	6	6	6	6	6	6	7	6	6	6	6	6	6	3	7	6	7
DM178	6	3	7	7	6	6	7	7	6	6	6	6	6	6	7	6	6	7	6	6	6	7	6	6	7	7
DM179	6	6	7	7	6	6	6	6	7	6	6	6	7	6	6	6	7	6	6	6	7	6	6	7	6	6
DM180	7	6	6	6	7	6	6	6	7	6	6	6	6	6	6	6	7	7	7	6	7	7	6	7	6	6
DM181	6	7	3	3	6	6	3	6	7	6	6	3	6	6	3	7	7	6	6	3	6	3	7	7	6	3
DM182	6	6	7	6	6	6	6	7	6	6	6	6	6	6	6	7	3	7	7	6	3	7	6	3	7	6
DM183	7	6	6	6	6	3	7	3	6	3	6	3	6	6	7	6	7	6	7	7	6	6	3	7	6	6
DM184	6	6	7	6	7	7	3	7	3	3	7	3	1	3	6	6	6	6	6	6	6	3	6	3	3	6
DM185	1	3	3	6	1	3	7	6	7	3	3	3	7	3	3	3	7	3	6	6	7	3	3	6	6	6
DM186	6	7	6	1	3	3	1	3	6	6	3	1	1	1	1	3	6	6	3	3	1	3	3	6	6	7
DM187	3	6	6	7	3	6	3	7	7	6	6	6	7	6	6	7	7	6	7	7	7	7	6	6	6	7
DM188	7	6	6	6	6	6	6	7	7	6	6	6	7	6	6	7	7	6	6	6	7	6	6	7	6	6
DM189	7	6	6	6	7	6	6	6	7	6	6	6	7	6	6	6	7	6	6	6	6	6	3	7	6	6
DM190	6	6	6	6	6	6	7	6	6	6	6	6	7	7	6	6	7	6	6	6	6	6	6	6	6	7
DM191	6	6	6	7	6	6	6	7	6	6	6	7	6	6	7	7	6	7	6	6	6	6	6	6	6	6
DM192	3	7	7	6	7	6	6	6	7	6	6	6	6	3	6	7	6	6	6	6	6	6	3	7	6	7
DM193	7	3	6	6	6	6	7	7	3	6	6	6	6	6	7	6	6	7	6	6	6	7	6	6	7	7
DM194	3	6	6	6	3	3	6	3	7	3	6	3	7	3	6	3	7	3	3	6	7	3	3	7	3	3
DM195	6	3	6	6	7	3	6	3	7	6	3	6	3	6	6	3	7	7	7	6	7	7	3	7	6	3
DM196	6	6	6	6	3	3	6	3	7	3	3	6	3	3	6	7	7	3	3	6	3	6	7	7	3	6
DM197	6	6	7	6	6	6	6	7	6	6	6	6	6	6	6	7	6	7	7	6	6	7	6	6	7	6
DM198	6	6	7	6	3	6	7	6	3	6	3	6	3	3	7	3	7	6	6	6	6	6	6	7	6	6
DM199	3	6	6	6	7	6	7	6	6	6	6	6	6	6	6	6	6	6	6	6	6	6	6	6	6	6
DM200	3	6	6	6	6	6	6	7	7	6	6	6	6	6	6	6	6	6	6	6	6	6	6	6	6	7
DM201	3	6	6	6	6	7	6	7	6	6	7	6	6	6	6	6	6	7	6	7	6	7	6	6	7	7
DM202	6	6	6	6	6	6	6	6	6	6	6	6	6	6	6	6	6	6	6	6	6	6	6	6	6	6
DM203	6	6	6	7	6	6	6	6	7	7	6	6	7	7	6	7	6	6	7	6	7	7	6	6	3	6
DM204	3	6	7	6	6	6	6	6	7	6	6	6	6	6	6	6	6	7	7	6	6	6	6	6	6	6
DM205	3	6	6	6	3	6	6	6	6	6	6	6	6	6	3	6	6	6	6	6	6	6	6	6	7	6
DM206	6	6	6	6	7	6	7	6	7	6	6	6	7	6	6	6	7	6	6	6	6	6	6	7	7	6
DM207	3	6	6	6	7	7	6	6	6	6	7	6	6	6	6	6	6	6	6	6	6	6	6	6	6	7
DM208	6	3	3	3	6	3	3	6	7	6	6	6	6	6	6	6	7	6	6	3	3	6	6	3	3	6
DM209	7	6	7	6	6	6	6	6	6	7	6	6	6	6	6	6	6	6	7	6	6	6	6	6	6	6
DM210	6	6	7	7	6	6	7	6	6	6	6	3	6	7	6	7	6	6	6	7	7	6	6	6	6	6
DM211	3	7	7	7	6	6	6	6	6	6	7	6	3	3	6	6	7	6	6	7	6	7	6	6	6	7
DM212	1	2	2	4	3	3	1	1	2	1	2	9	1	2	1	1	1	3	2	2	1	1	1	1	1	2
DM213	10	9	8	7	10	6	6	9	6	7	7	9	9	10	5	8	7	8	9	7	7	7	9	7	8	9
DM214	10	10	10	10	10	10	10	10	6	6	7	7	7	7	7	7	8	8	8	8	6	7	8	7	7	7
DM215	7	5	8	7	6	4	3	5	4	6	4	4	4	4	7	5	4	4	3	3	5	3	8	4	4	3
DM216	9	9	7	7	8	7	7	6	5	5	4	3	6	6	5	7	6	3	4	3	7	6	6	8	5	5
DM217	2	2	3	3	5	5	4	2	2	2	2	2	5	4	7	6	6	4	2	3	5	6	5	1	2	4
DM218	4	3	2	6	9	8	7	7	2	2	8	6	5	9	3	3	10	8	7	7	10	9	8	8	5	6
DM219	10	10	5	10	10	9	9	10	2	2	2	2	10	9	8	9	10	8	10	7	10	9	10	9	6	5
DM220	10	9	8	9	10	9	8	7	2	2	2	2	10	10	10	10	10	9	9	9	10	10	10	10	10	10
DM221	1	3	2	2	1	2	2	2	2	1	2	3	2	1	2	1	1	2	2	2	2	2	2	10	10	9
DM222	10	10	10	10	10	9	7	7	2	2	9	2	9	9	8	8	8	8	8	8	10	9	8	10	9	10
DM223	10	9	8	8	10	9	9	10	7	6	7	9	10	9	8	8	10	9	9	9	10	9	9	10	9	9
DM224	9	9	8	9	9	9	9	9	9	9	9	9	8	8	8	9	9	8	8	8	9	8	8	10	7	6
DM225	10	9	9	8	10	9	10	10	10	9	10	9	10	10	10	10	10	10	10	10	10	10	10	9	8	9
DM226	6	6	6	6	6	6	6	6	6	6	6	6	6	6	6	7	6	6	6	6	6	7	6	7	7	7
DM227	3	3	3	6	6	6	3	6	6	6	6	6	3	6	6	7	6	6	3	3	3	6	6	3	6	3
DM228	1	1	1	1	6	3	3	3	1	1	1	1	3	1	1	6	3	3	6	1	3	6	6	3	1	1
DM229	3	3	3	1	6	3	3	3	3	3	3	6	6	6	6	3	3	3	3	3	6	3	3	3	6	6
DM230	3	3	3	3	6	3	3	1	3	1	3	3	3	1	3	1	1	3	1	3	3	3	3	3	3	3
DM231	3	3	3	6	6	3	3	3	3	3	6	3	6	6	6	6	3	3	3	1	3	3	3	1	3	3
DM232	3	3	3	3	3	3	3	1	3	3	3	6	3	3	3	1	3	3	3	3	3	3	3	3	6	3
DM233	7	7	7	7	1	1	1	1	3	3	3	3	3	3	1	1	6	3	3	6	6	6	6	9	7	6
DM234	3	3	3	3	1	6	1	1	3	3	7	7	9	6	6	3	6	3	3	3	3	9	9	1	1	1
