# Supplementary material for: Digital security vulnerabilities and threats implications for financial institutions deploying digital technology platforms and application: FMEA and FTOPSIS analysis
Source: PeerJ Comput Sci. 2021 Aug 3;7:e658. doi: 10.7717/peerj-cs.658 (PMC8356653; doi:10.7717/peerj-cs.658)
Supplement: Supplemental Information 2 [file peerj-cs-07-658-s002.pdf]

## QUESTIONNAIRE

Dear Participant,

## INFORM CONSENT

This research seeks to understand the antecedents of Digital Innovation deployment on digital security risk management: an evaluation of digital security risk with Failure Mode Effect Analysis (FMEA) and Fuzzy AHP techniques. Digital security risks aspects are a combination of vulnerabilities from the digital platforms, physical environment, the people and the organisation within the digital ecosystems. The outcomes of this research are to exude the various level of digital security vulnerabilities by deploying and usage of Big Data Analytics (BDA), Internet of Things (IoTs) and Cloud Computing (CC) applications and platforms. This will be used to provide a framework for organization to support strategy in mitigating digital security risk through the deployment and usage of digital innovations platforms and applications in the Banking Sector.

Your kind and objective responses will significantly contribute to the topic. Any information provided is strictly for academic purposes and would be treated with utmost confidentiality. This research has been reviewed for ethical appropriateness by the Ethics and Research Committee of the school. After completion, you can access the research results upon request.

Please, do not hesitate to contact me by email if you have queries, or seek clarifications.

Thank you

This part of the questionnaire is based on a **10-point linguist scale** used for evaluating *Occurrence (O)*, *Severity (S)* and *Detection (D)* of vulnerabilities in a system as recommended by Goodman (1996), and used for FMEA applications (Lin et al., 2014; Lui et al., 2012).

Please indicate the level of risk failures mode and weights for each vulnerability and their likelihood of occurrence, severity and detection on each of the risk dimensions identified.

**Severity (S) Rating Scales: the extent of failure mode affecting the entire system**  
**Where 10- Extremely Vulnerable and 1 No Vulnerability**

[illegible]

[illegible]

### 10- Certain probability of occurrence and 1- Remote probability of occurrence

[illegible]

[illegible]

**Detection (D) Rating Scale-** the probability of detecting the failure  
**10- No chance of detection and 1- Almost chance of detection**

[illegible]

[illegible]
